# Supplementary material for: Rockglaciers on the run – Understanding rockglacier landform evolution and recent changes from numerical flow modeling
Source: Copernicus journal article supplement (doi:10.5194/tc-2016-35), 2016-02-29
Supplement: Supplementary file 1 [file tc-2016-35-supplement.pdf]

# Supplement to “**Rockglaciers on the move – Understanding rockglacier landform evolution and recent change from numerical flow modeling**”

Johann Müller<sup>1</sup>, Andreas Vieli<sup>1</sup>, Isabelle Gärtner-Roer<sup>1</sup>

<sup>1</sup>Department of Geography, University of Zurich, Zurich, 8004, Switzerland

5 *Correspondence to:* Johann Müller (johann.mueller@geo.uzh.ch)

Supplement

## **S1 Perturbation Experiments**

12 scenarios for each rockglacier were developed assuming three different initial thermal states of each rockglacier (-2°C, -1.5°C and -1°C). A potential warming of 1°C was combined with four different scenarios concerning the material input resulting from the suggested temperature increase:

| <b>Model run</b>  | <b>Creep Rate change</b> | <b>Accumulation change</b> |
|-------------------|--------------------------|----------------------------|
| 1.4*A and 0*Acc   | 1.4*A                    | 0*a <sub>r</sub>           |
| 1.4*A and 0.4*Acc | 1.4*A                    | 0.4*a <sub>r</sub>         |
| 1.4*A and 1*Acc   | 1.4*A                    | 1*a <sub>r</sub>           |
| 1.4*A and 2*Acc   | 1.4*A                    | 2*a <sub>r</sub>           |
| 1.7*A and 0*Acc   | 1.7*A                    | 0*a <sub>r</sub>           |
| 1.7*A and 0.4*Acc | 1.7*A                    | 0.4*a <sub>r</sub>         |
| 1.7*A and 1*Acc   | 1.7*A                    | 1*a <sub>r</sub>           |
| 1.7*A and 2*Acc   | 1.7*A                    | 2*a <sub>r</sub>           |
| 2.7*A and 0*Acc   | 2.7*A                    | 0*a <sub>r</sub>           |
| 2.7*A and 0.4*Acc | 2.7*A                    | 0.4*a <sub>r</sub>         |
| 2.7*A and 1*Acc   | 2.7*A                    | 1*a <sub>r</sub>           |
| 2.7*A and 2*Acc   | 2.7*A                    | 2*a <sub>r</sub>           |

The following presents the evolution of surface along central flow line, thickness, thickness change and horizontal velocities of all experiments for the modelled time and both rockglaciers.

## S1.1 Murtèl perturbation experiments

### S1.1.1 Initial rockglacier temperature $-2^{\circ}\text{C}$ , therefore $1.4 \times$ rate factor A for a $1^{\circ}\text{C}$ warming.

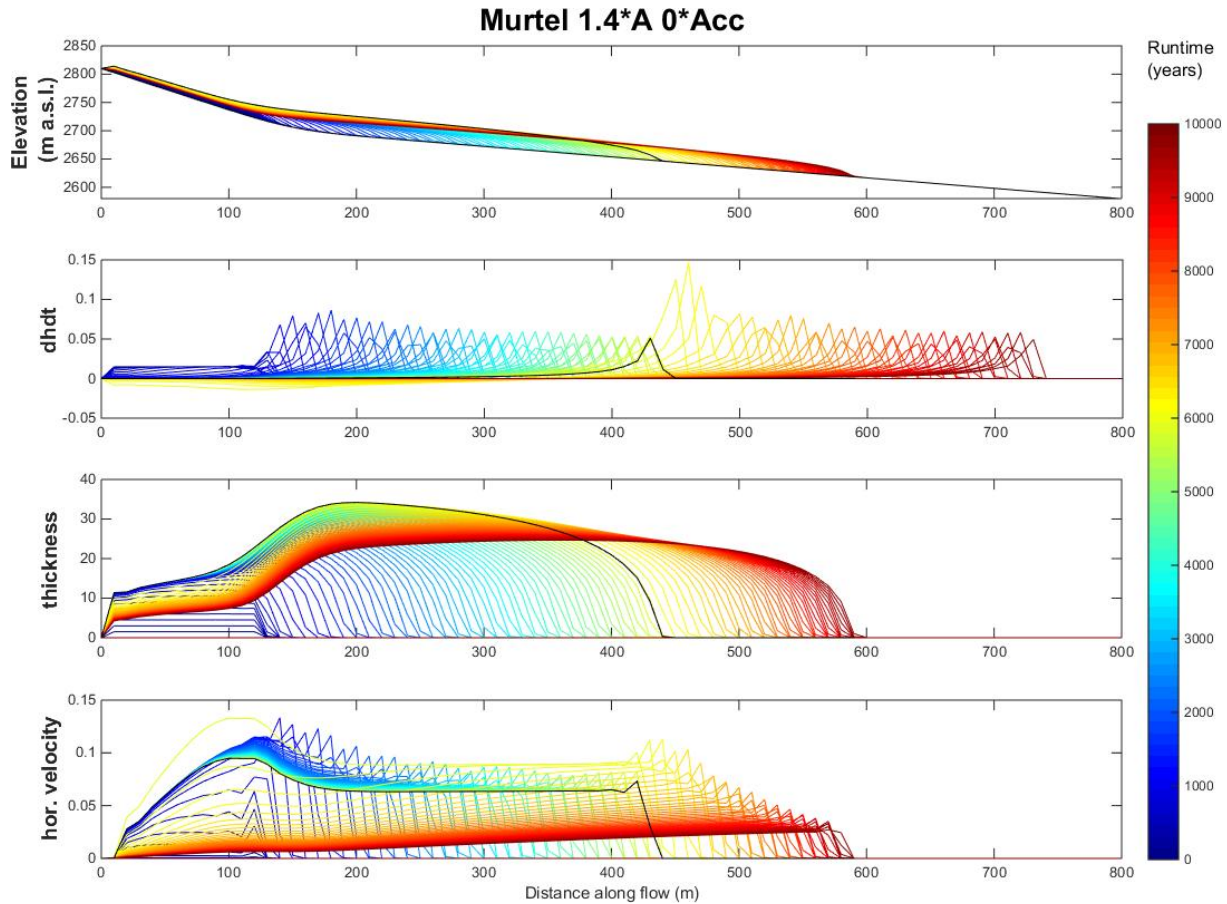

**Figure S1:** The evolution of surface geometry, thickness change ( $dhdt$ ) absolute thickness in m horizontal velocity along the central flow line for rockglacier built-up (6000 years runtime / black line) and complex perturbation experiment (temperature increase of  $1^{\circ}\text{C}$  for a  $-2^{\circ}\text{C}$  rockglacier and no material input after 6000 years). The lines are plotted in 100yr steps. Colour scale applies to all following Figures.

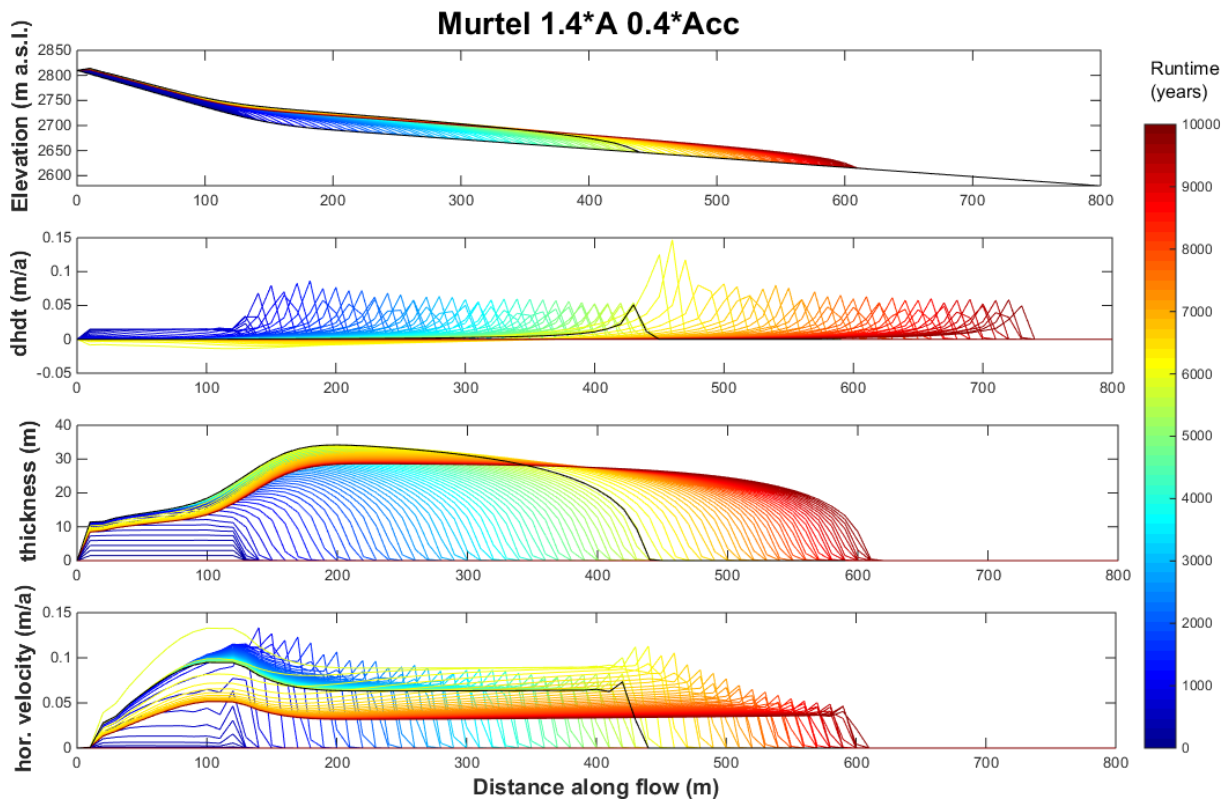

**Figure S2:** The evolution of surface geometry, thickness change (dhdt) absolute thickness in m horizontal velocity along the central flow line for rockglacier built-up (6000 years runtime / black line) and complex perturbation experiment (temperature increase of 1°C for a -2°C rockglacier and reduced material input (40%) after 6000 years). The lines are plotted in 100yr steps. Colour scale applies to all following Figures

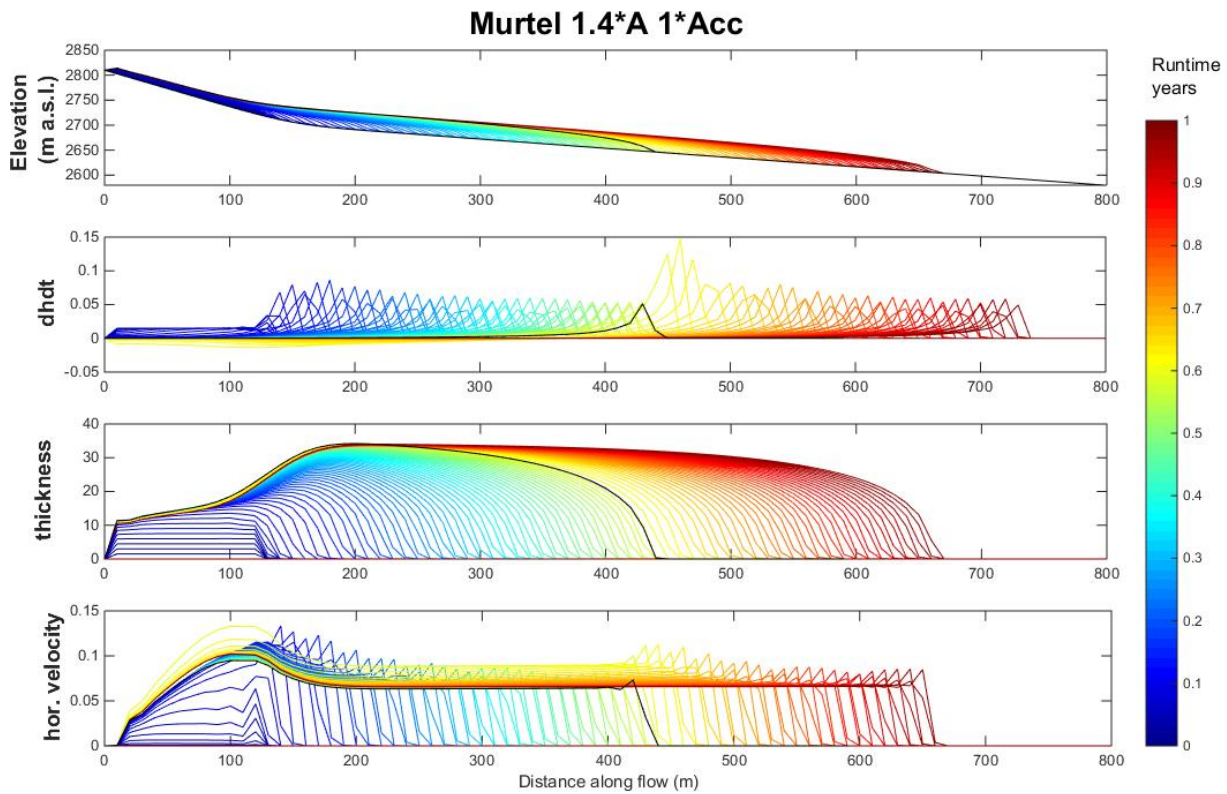

**Figure S3:** The evolution of surface geometry, thickness change (dhdt) absolute thickness in m horizontal velocity along the central flow line for rockglacier built-up (6000 years runtime / black line) and complex perturbation experiment (temperature increase of 1°C for a -2°C rockglacier and no change in material input after 6000 years). The lines are plotted in 100yr steps.

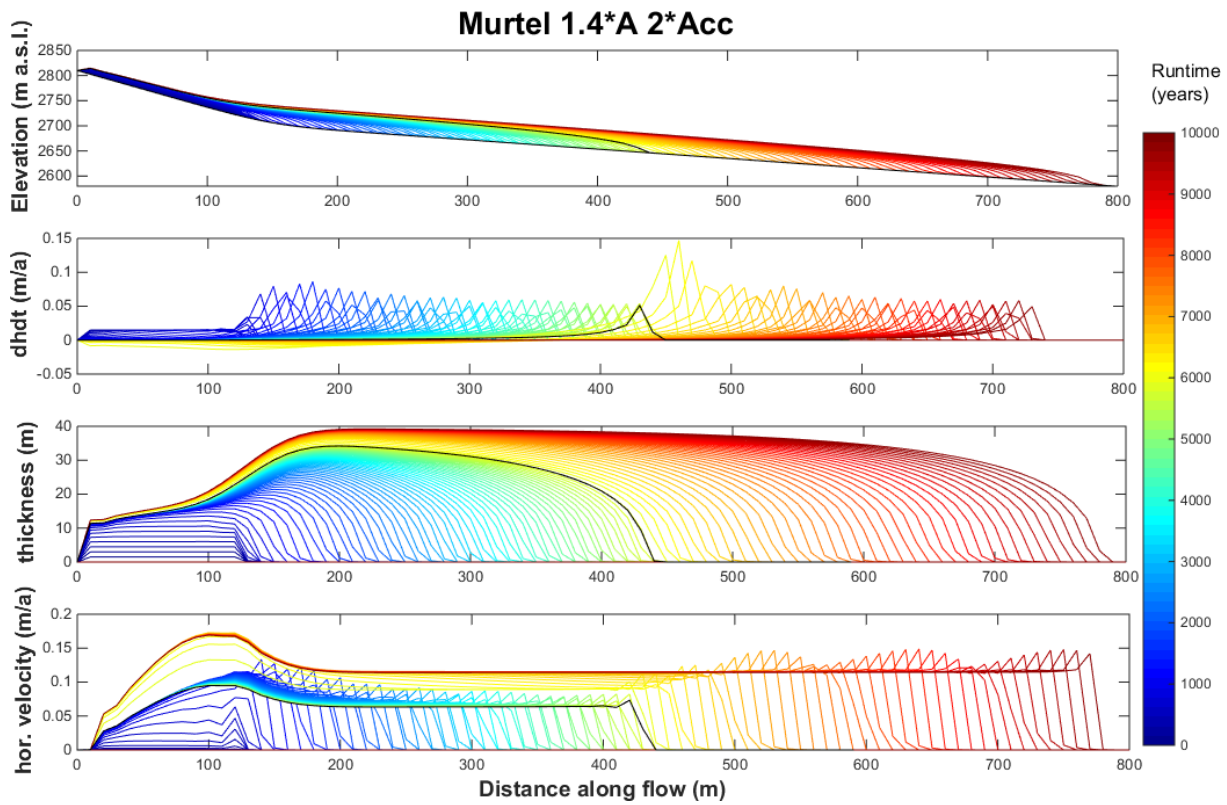

**Figure S4:** The evolution of surface geometry, thickness change (dhdt) absolute thickness in m horizontal velocity along the central flow line for rockglacier built-up (6000 years runtime / black line) and complex perturbation experiment (temperature increase of 1°C for a -2°C rockglacier and doubled material input after 6000 years). The lines are plotted in 100yr steps.

S1.1.2 Initial rockglacier temperature  $-1.5^{\circ}\text{C}$ , therefore  $1.7 \cdot \text{rate factor A}$  for a  $1^{\circ}\text{C}$  warming.

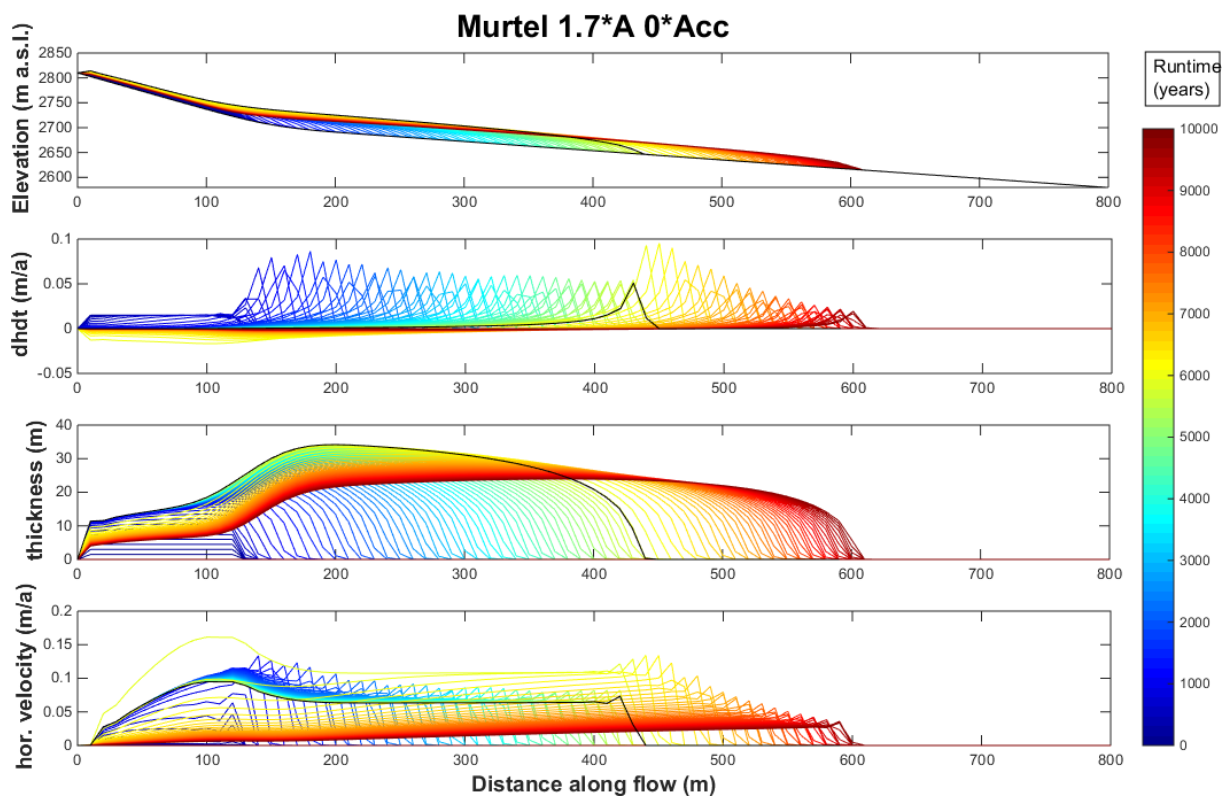

Figure S5: The evolution of surface geometry, thickness change (dhdt) absolute thickness in m horizontal velocity along the central flow line for rockglacier built-up (6000 years runtime / black line) and complex perturbation experiment (temperature increase of  $1^{\circ}\text{C}$  for a  $-1.5^{\circ}\text{C}$  rockglacier and no material input after 6000 years). The lines are plotted in 100yr steps.

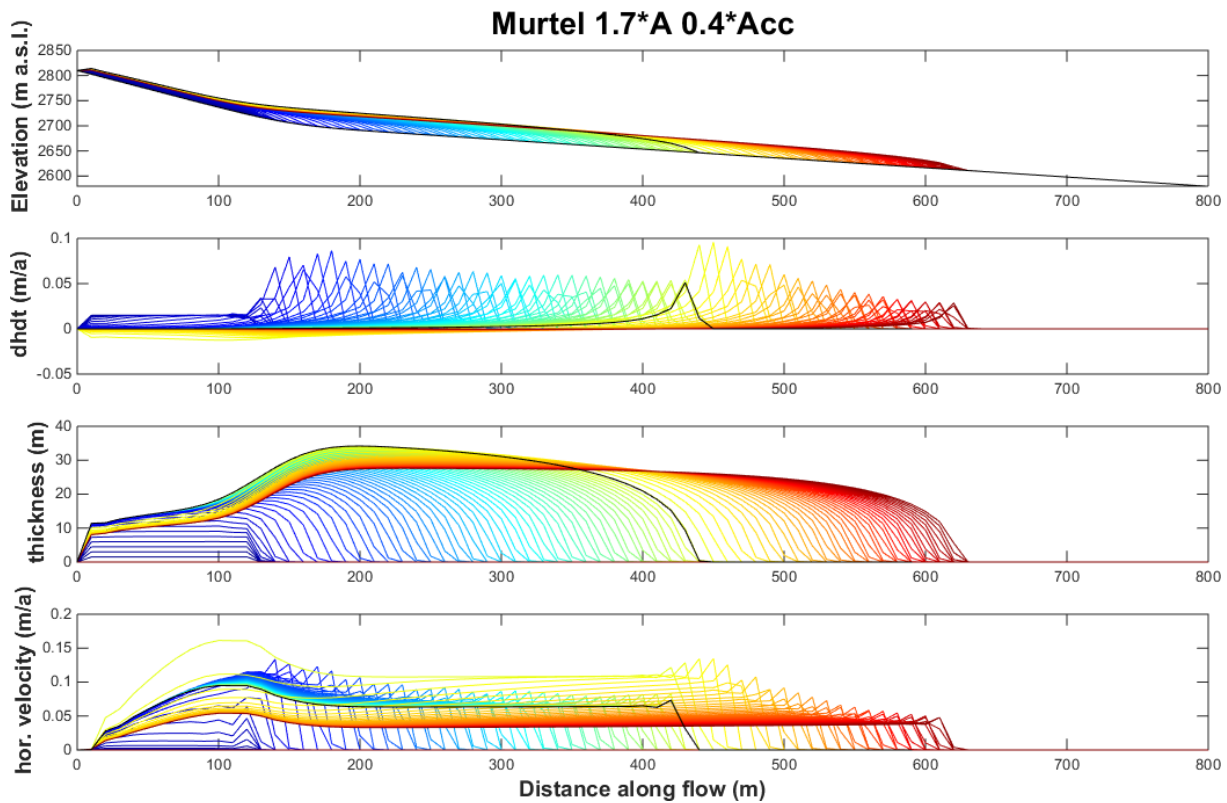

**Figure S6: The evolution of surface geometry, thickness change (dhdt) absolute thickness in m horizontal velocity along the central flow line for rockglacier built-up (6000 years runtime / black line) and complex perturbation experiment (temperature increase of 1°C for a -1.5°C rockglacier and reduced material input (40%) after 6000 years). The lines are plotted in 100yr steps. Colour scale applies to all following Figures**

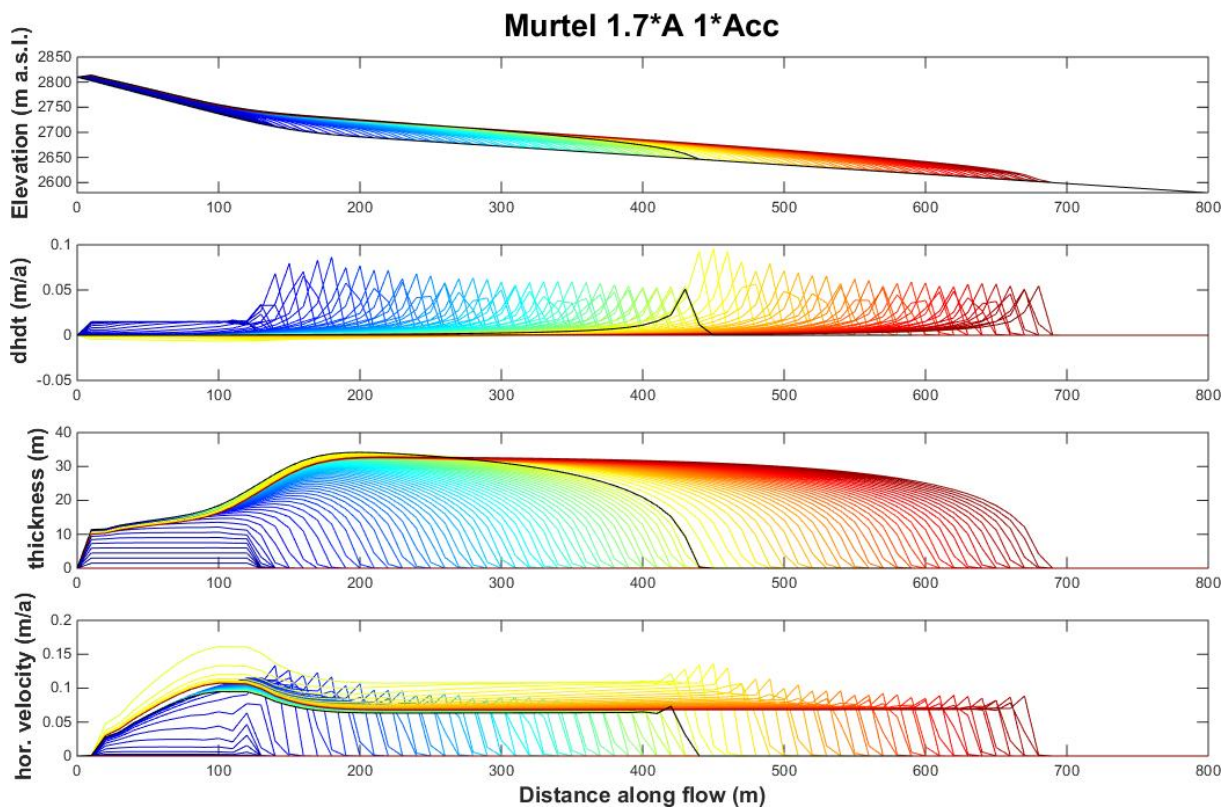

**Figure S7:** The evolution of surface geometry, thickness change (dhdt) absolute thickness in m horizontal velocity along the central flow line for rockglacier built-up (6000 years runtime / black line) and complex perturbation experiment (temperature increase of 1°C for a -1.5°C rockglacier and no change in material input after 6000 years). The lines are plotted in 100yr steps.



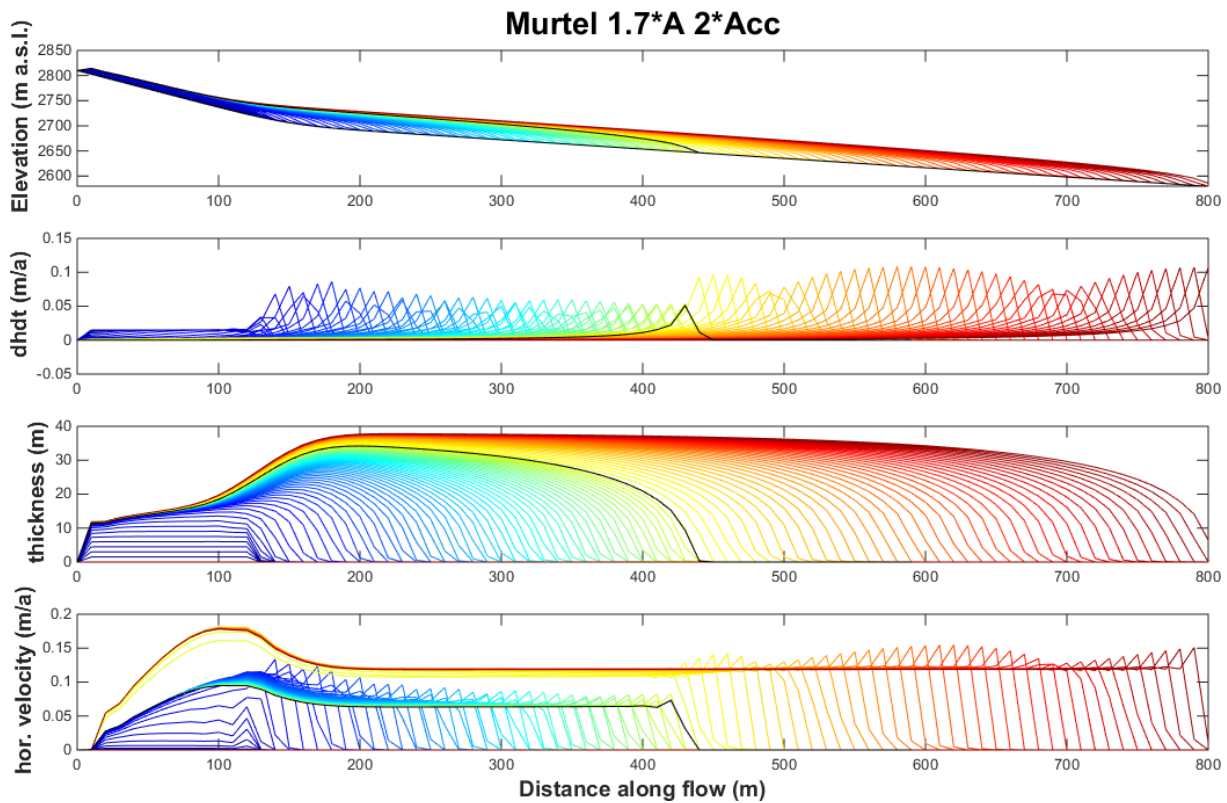

**Figure S8:** The evolution of surface geometry, thickness change (dhdt) absolute thickness in m horizontal velocity along the central flow line for rockglacier built-up (6000 years runtime / black line) and complex perturbation experiment (temperature increase of 1°C for a -1.5°C rockglacier and doubled material input after 6000 years). The lines are plotted in 100yr steps.

S1.1.3 Initial rockglacier temperature  $-1^{\circ}\text{C}$ , therefore  $2.7^*$ rate factor A for a  $1^{\circ}\text{C}$  warming.

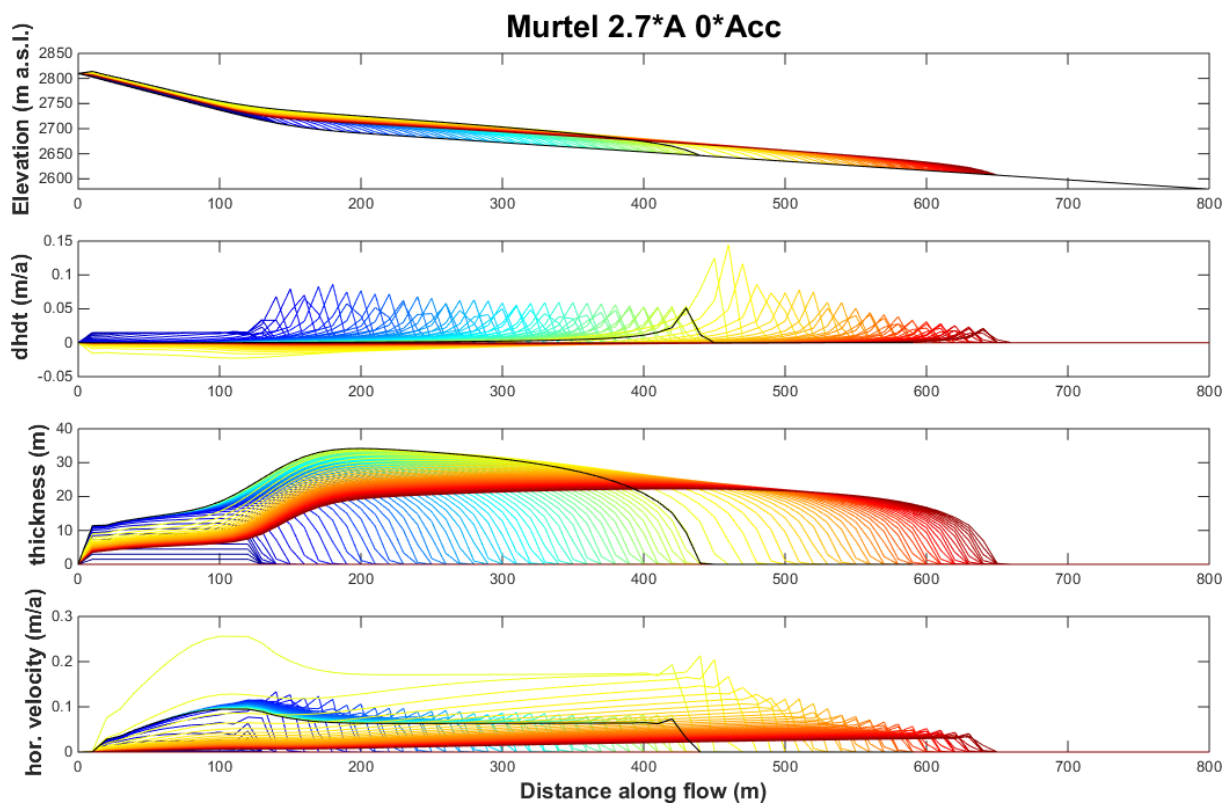

Figure S9: The evolution of surface geometry, thickness change (dhdt) absolute thickness in m horizontal velocity along the central flow line for rockglacier built-up (6000 years runtime / black line) and complex perturbation experiment (temperature increase of  $1^{\circ}\text{C}$  for a  $-1^{\circ}\text{C}$  rockglacier and no material input after 6000 years). The lines are plotted in 100yr steps

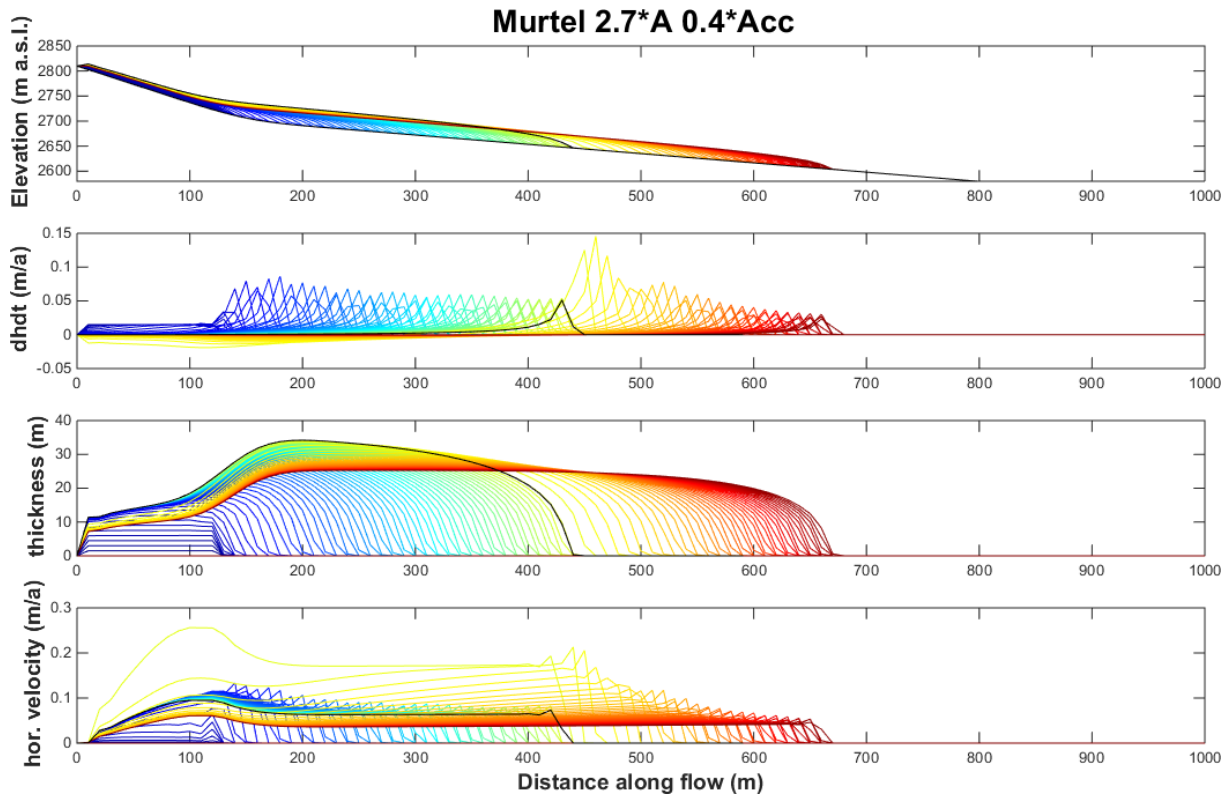

**Figure S10: The evolution of surface geometry, thickness change (dhdt) absolute thickness in m horizontal velocity along the central flow line for rockglacier built-up (6000 years runtime / black line) and complex perturbation experiment (temperature increase of 1°C for a -1°C rockglacier and reduced material input (40%) after 6000 years). The lines are plotted in 100yr steps. Colour scale applies to all following Figures**

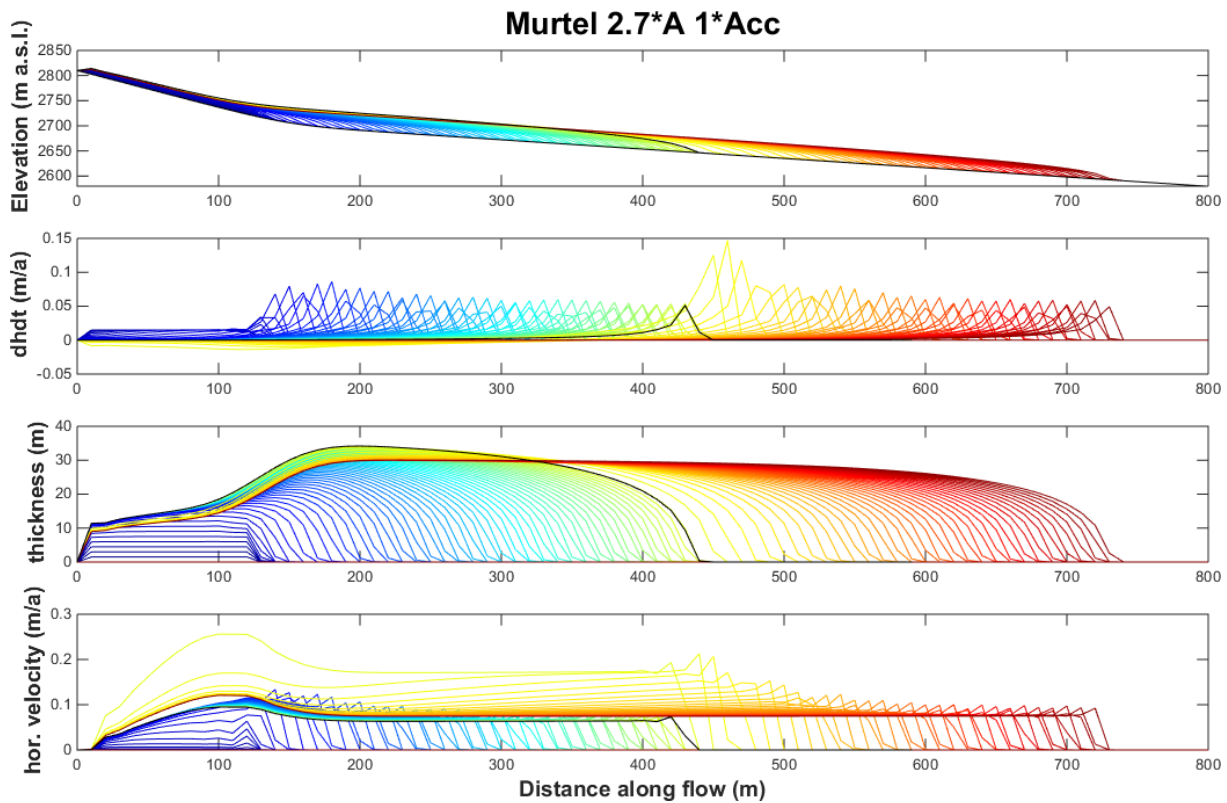

Figure S11: The evolution of surface geometry, thickness change (dhdt) absolute thickness in m horizontal velocity along the central flow line for rockglacier built-up (6000 years runtime / black line) and complex perturbation experiment (temperature increase of 1°C for a -1°C rockglacier and no change in material input after 6000 years). The lines are plotted in 100yr steps.

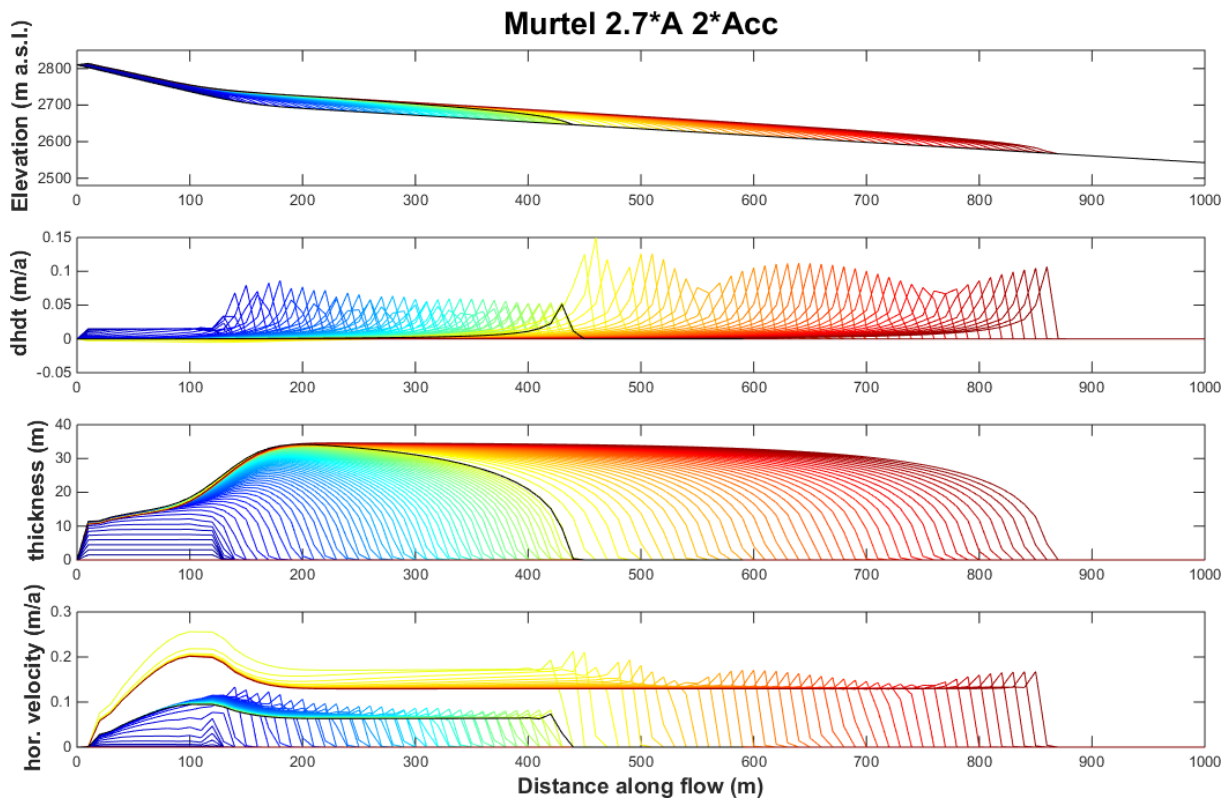

**Figure S12: The evolution of surface geometry, thickness change (dhdt) absolute thickness in m horizontal velocity along the central flow line for rockglacier built-up (6000 years runtime / black line) and complex perturbation experiment (temperature increase of 1°C for a -1°C rockglacier and doubled material input after 6000 years). The lines are plotted in 100yr steps.**

## S1.2 Huhh1 perturbation experiments

### S1.2.1 Initial rockglacier temperature $-2^{\circ}\text{C}$ , therefore $1.4 \times$ rate factor A for a $1^{\circ}\text{C}$ warming.

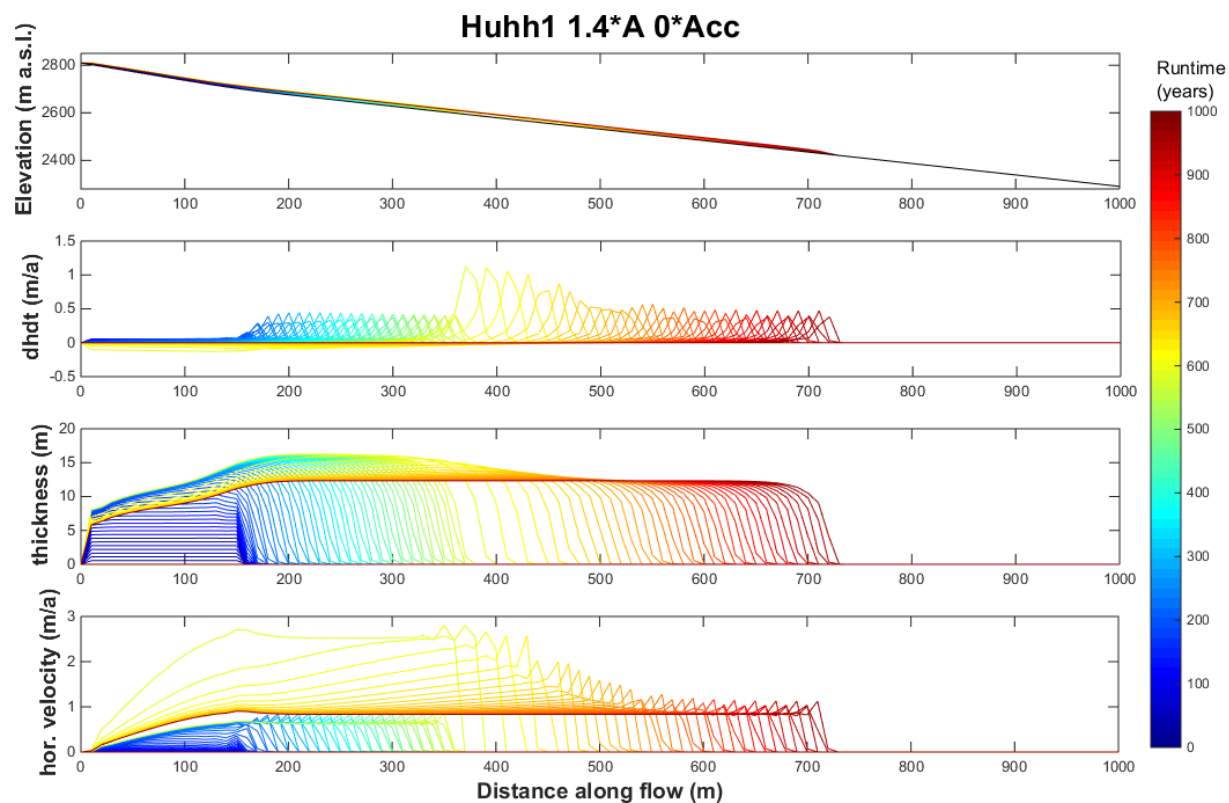

Figure S13: The evolution of surface geometry, thickness change (dhdt) absolute thickness in m horizontal velocity along the central flow line for rockglacier built-up (600 years runtime) and complex perturbation experiment (temperature increase of  $1^{\circ}\text{C}$  for a  $-2^{\circ}\text{C}$  rockglacier and no material input after 600 years). The lines are plotted in 10yr steps. Colour scale applies to all following Figures.

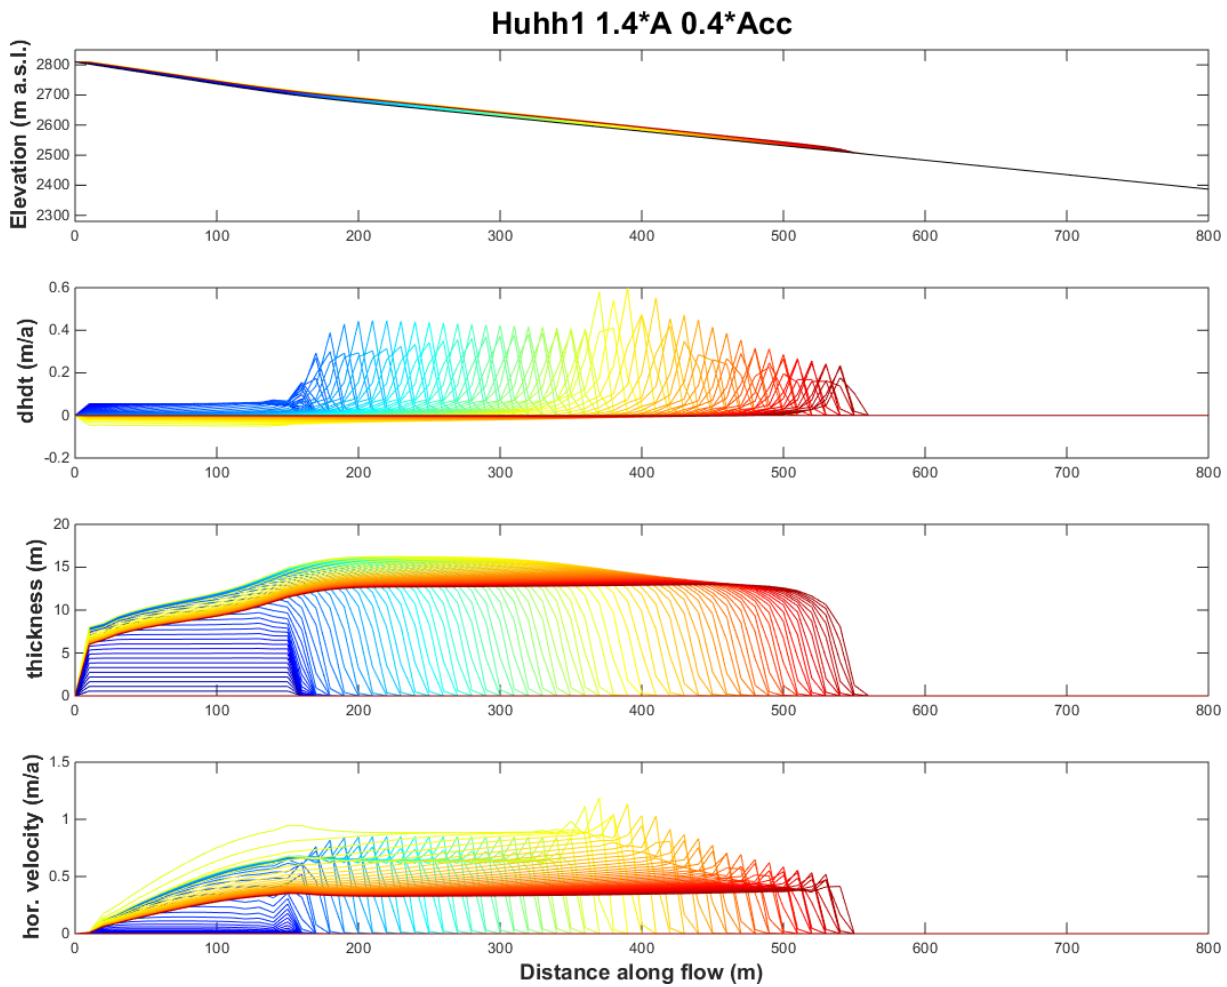

**Figure S14:** The evolution of surface geometry, thickness change (dhdt) absolute thickness in m horizontal velocity along the central flow line for rockglacier built-up (600 years runtime) and complex perturbation experiment (temperature increase of 1°C for a -2°C rockglacier and reduced material input (40%) after 600 years). The lines are plotted in 10yr steps.

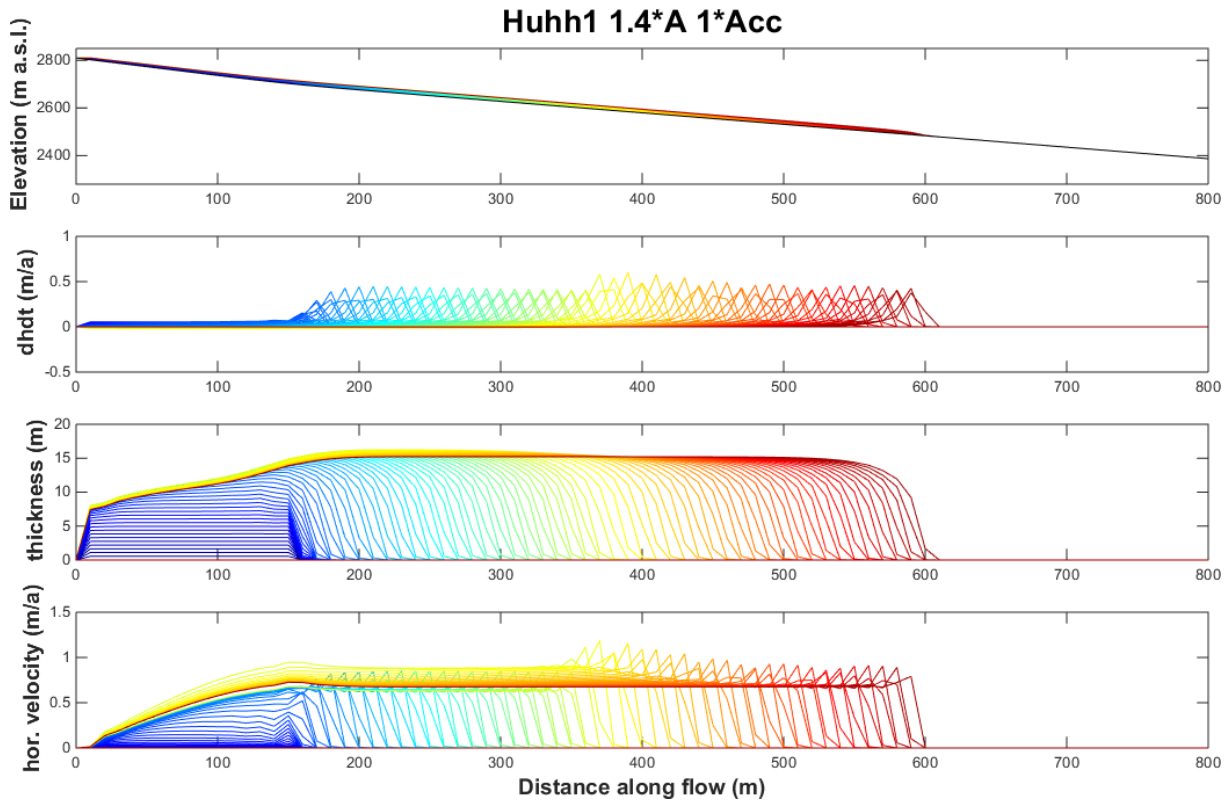

**Figure S15: The evolution of surface geometry, thickness change (dhdt) absolute thickness in m horizontal velocity along the central flow line for rockglacier built-up (600 years runtime) and complex perturbation experiment (temperature increase of 1°C for a -2°C rockglacier and no change in material input after 600 years). The lines are plotted in 10yr steps.**



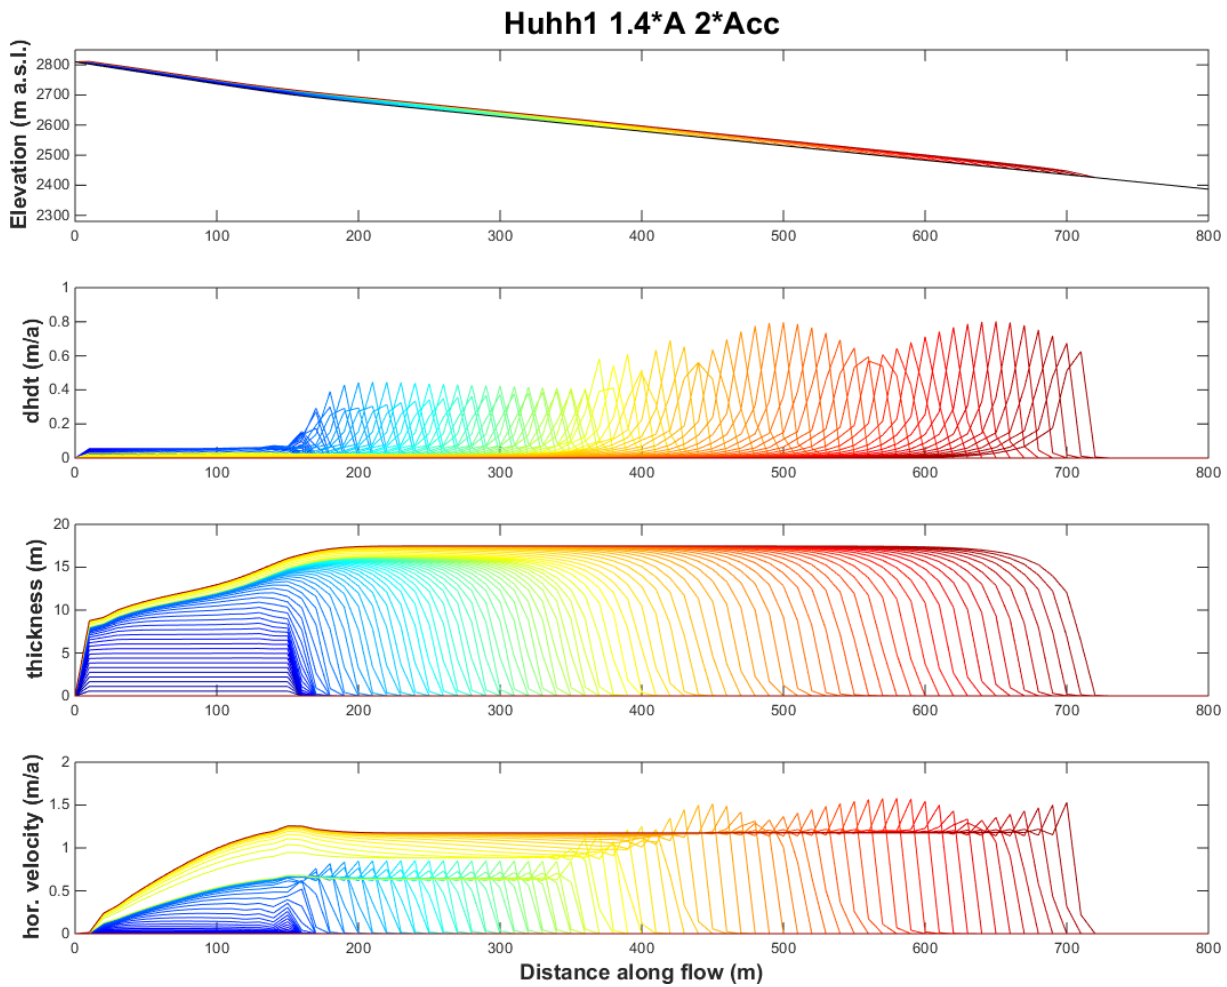

**Figure S16:** The evolution of surface geometry, thickness change (dhdt) absolute thickness in m horizontal velocity along the central flow line for rockglacier built-up (600 years runtime) and complex perturbation experiment (temperature increase of 1°C for a -2°C rockglacier and doubled material input after 600 years). The lines are plotted in 10yr steps.

S1.2.2 Initial rockglacier temperature  $-1.5^{\circ}\text{C}$ , therefore  $1.7 \times$  rate factor A for a  $1^{\circ}\text{C}$  warming.

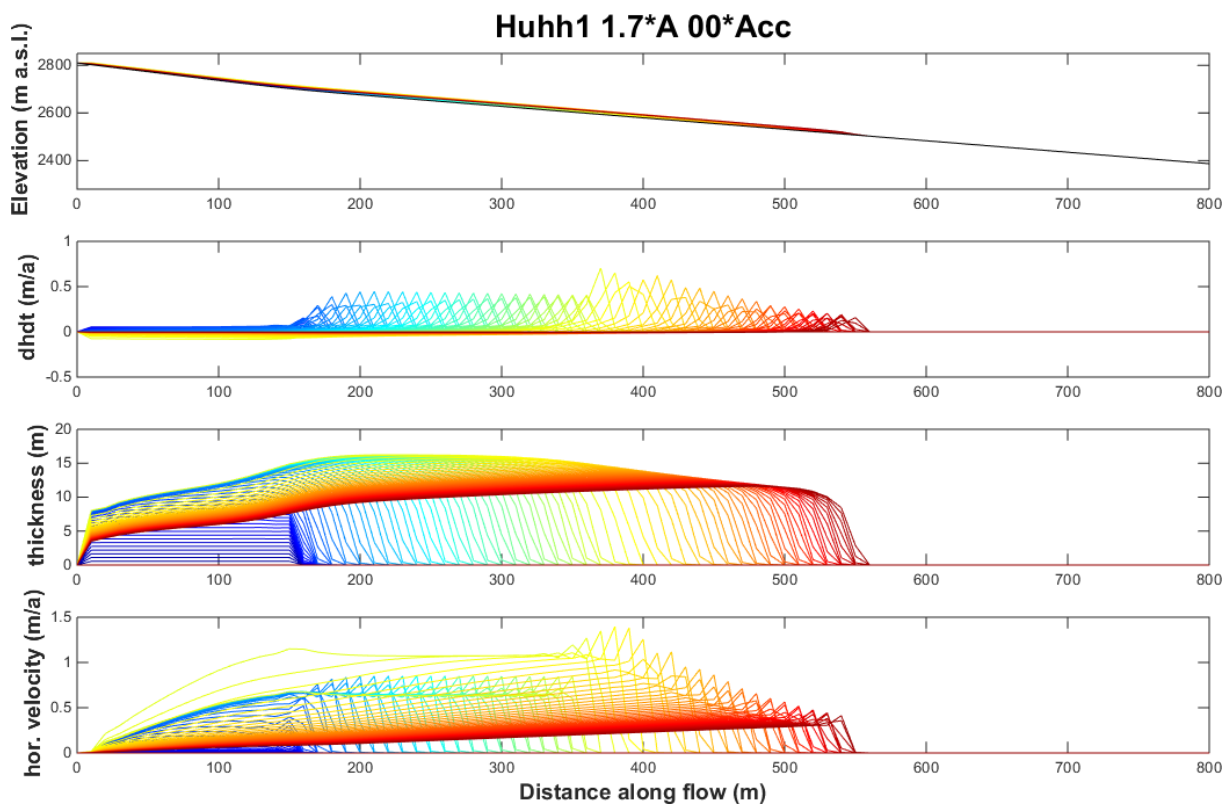

Figure S17: The evolution of surface geometry, thickness change (dhdt) absolute thickness in m horizontal velocity along the central flow line for rockglacier built-up (600 years runtime) and complex perturbation experiment (temperature increase of  $1^{\circ}\text{C}$  for a  $-1.5^{\circ}\text{C}$  rockglacier and no material input after 600 years). The lines are plotted in 10yr steps. Colour scale applies to all following Figures.

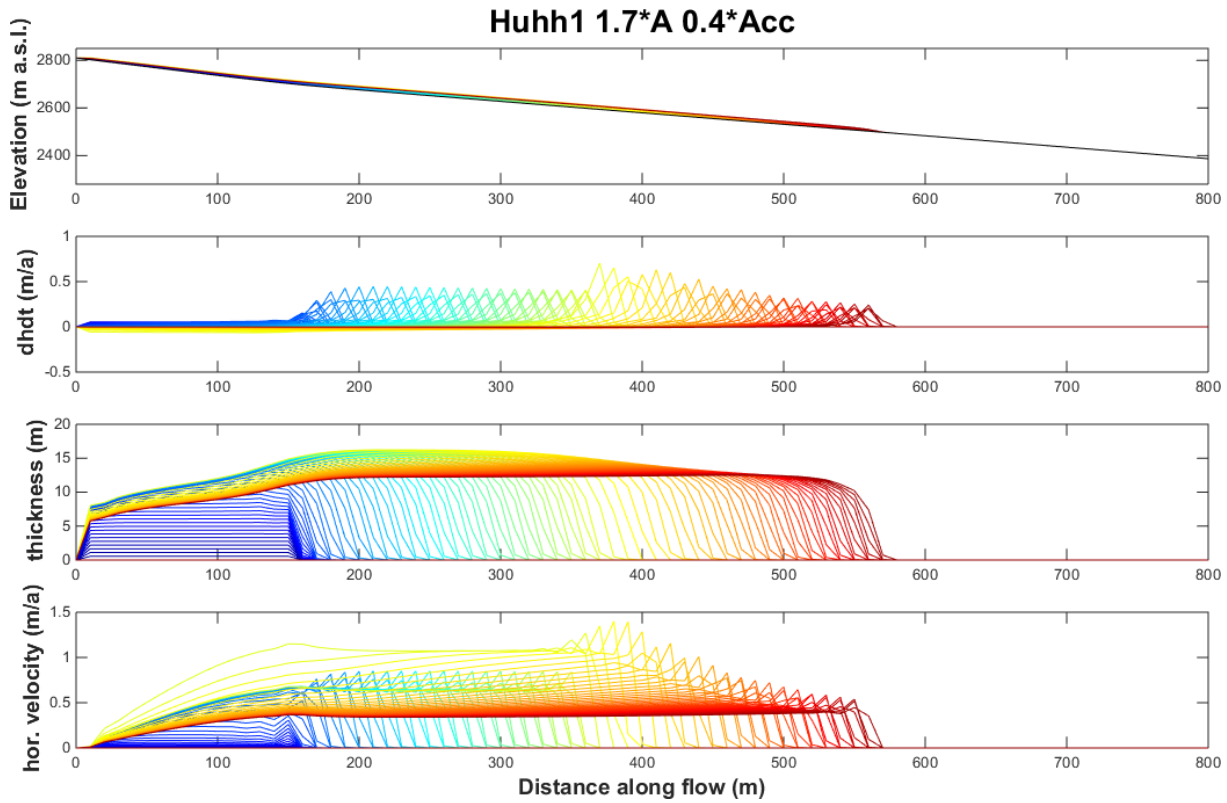

**Figure S18:** The evolution of surface geometry, thickness change (dhdt) absolute thickness in m horizontal velocity along the central flow line for rockglacier built-up (600 years runtime) and complex perturbation experiment (temperature increase of 1°C for a -1.5°C rockglacier and reduced material input (40%) after 600 years). The lines are plotted in 10yr steps.

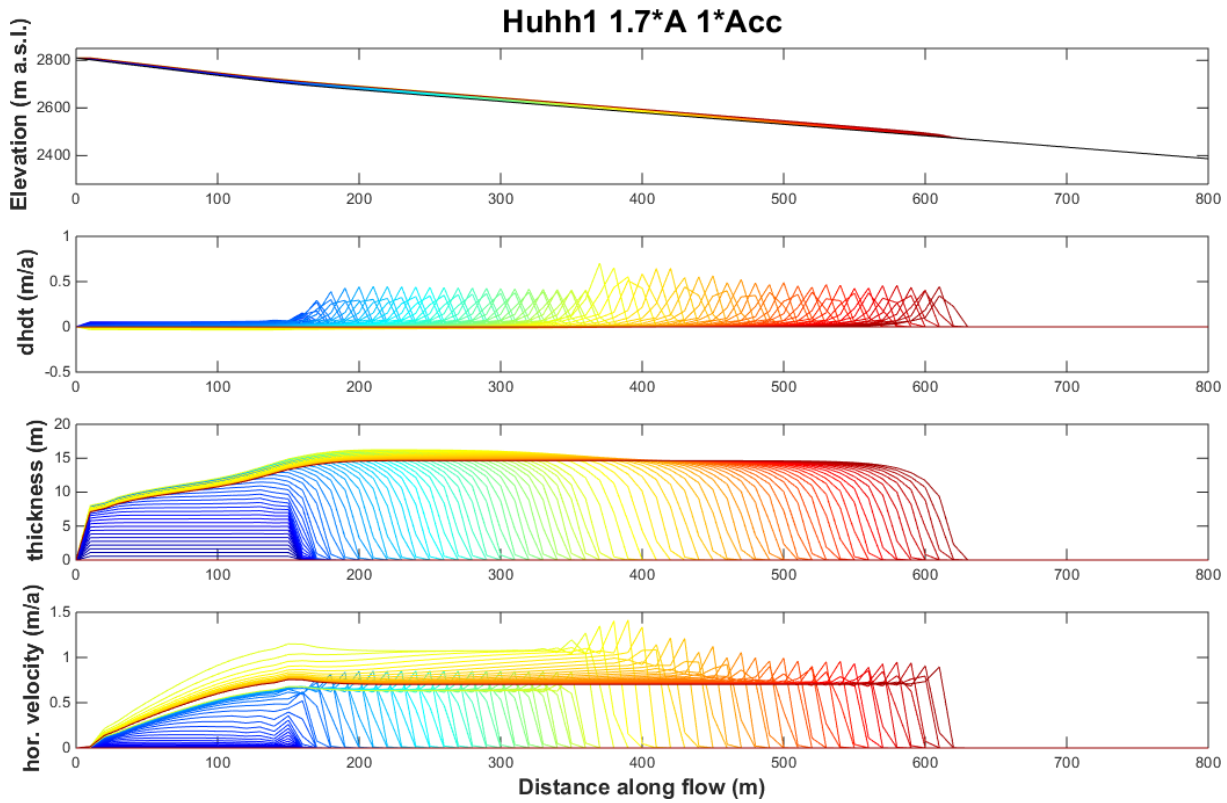

**Figure S19: The evolution of surface geometry, thickness change (dhdt) absolute thickness in m horizontal velocity along the central flow line for rockglacier built-up (600 years runtime) and complex perturbation experiment (temperature increase of 1°C for a -1.5°C rockglacier and no change in material input after 600 years). The lines are plotted in 10yr steps.**

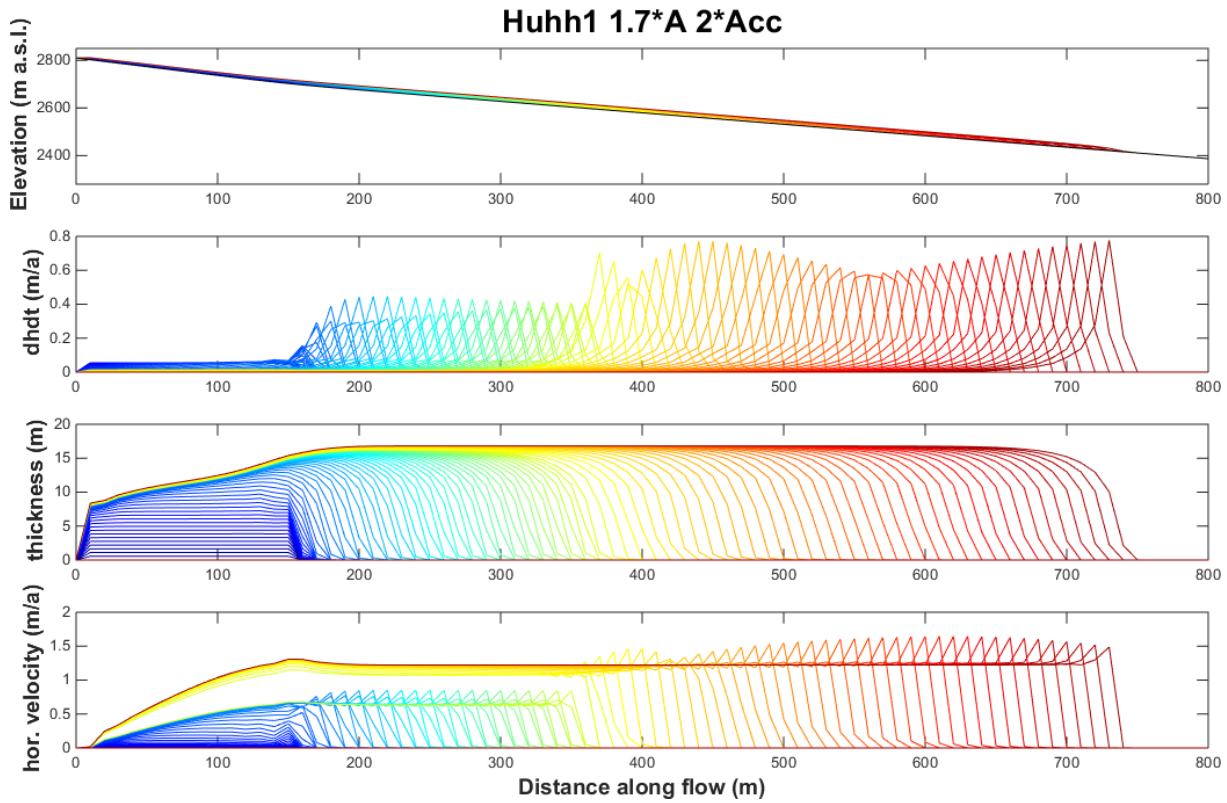

**Figure S20: The evolution of surface geometry, thickness change (dhdt) absolute thickness in m horizontal velocity along the central flow line for rockglacier built-up (600 years runtime) and complex perturbation experiment (temperature increase of 1°C for a -1.5°C rockglacier and doubled material input after 600 years). The lines are plotted in 10yr steps.**

S1.2.3 Initial rockglacier temperature  $-2^{\circ}\text{C}$ , therefore  $2.4 \times$  rate factor A for a  $1^{\circ}\text{C}$  warming.

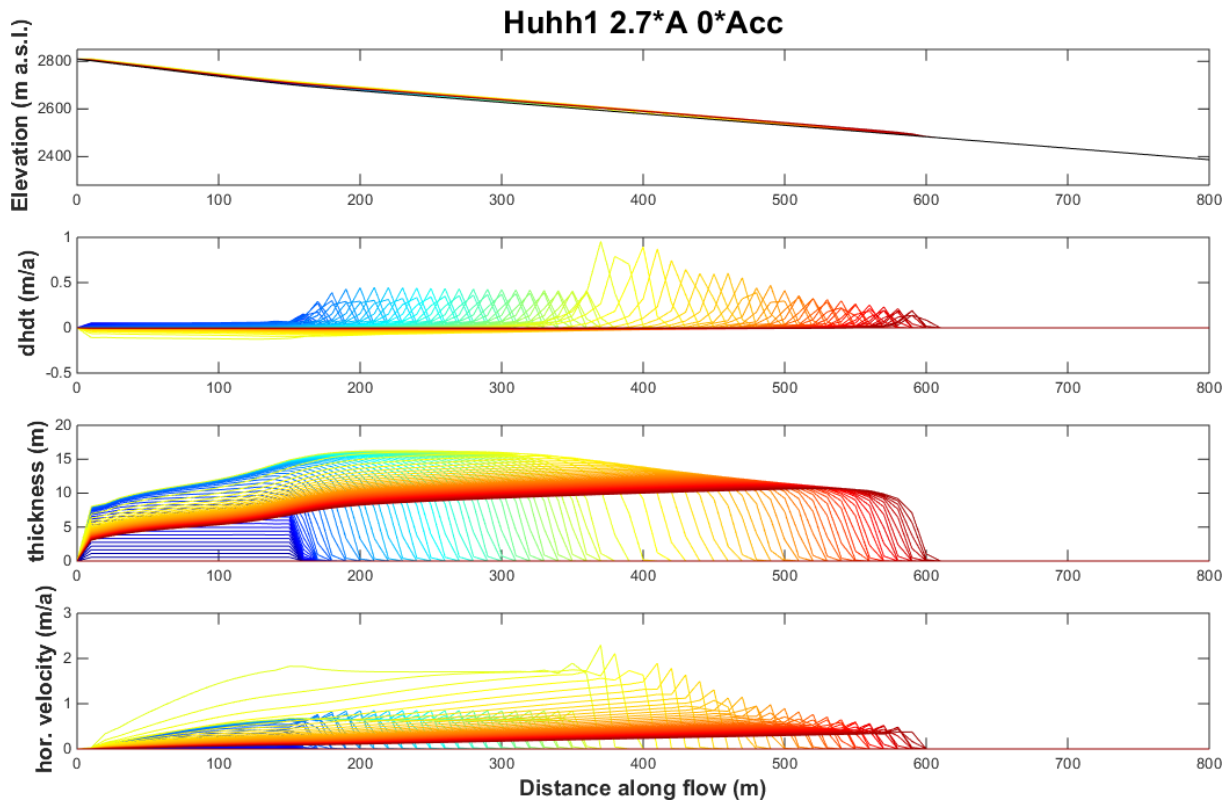

Figure S21: The evolution of surface geometry, thickness change (dhdt) absolute thickness in m horizontal velocity along the central flow line for rockglacier built-up (600 years runtime) and complex perturbation experiment (temperature increase of  $1^{\circ}\text{C}$  for a  $-1^{\circ}\text{C}$  rockglacier and no material input after 600 years). The lines are plotted in 10yr steps. Colour scale applies to all following Figures.

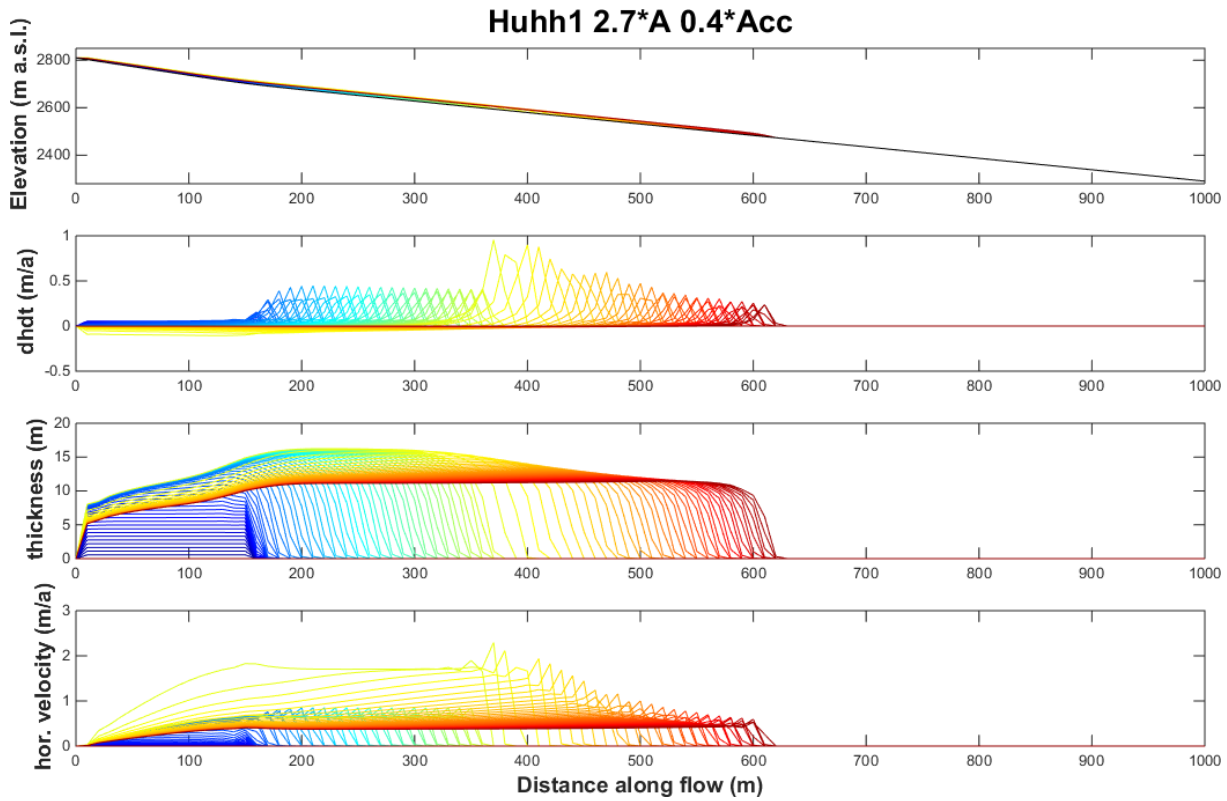

**Figure S22: The evolution of surface geometry, thickness change (dhdt) absolute thickness in m horizontal velocity along the central flow line for rockglacier built-up (600 years runtime) and complex perturbation experiment (temperature increase of 1°C for a -1°C rockglacier and reduced material input (40%) after 600 years). The lines are plotted in 10yr steps.**

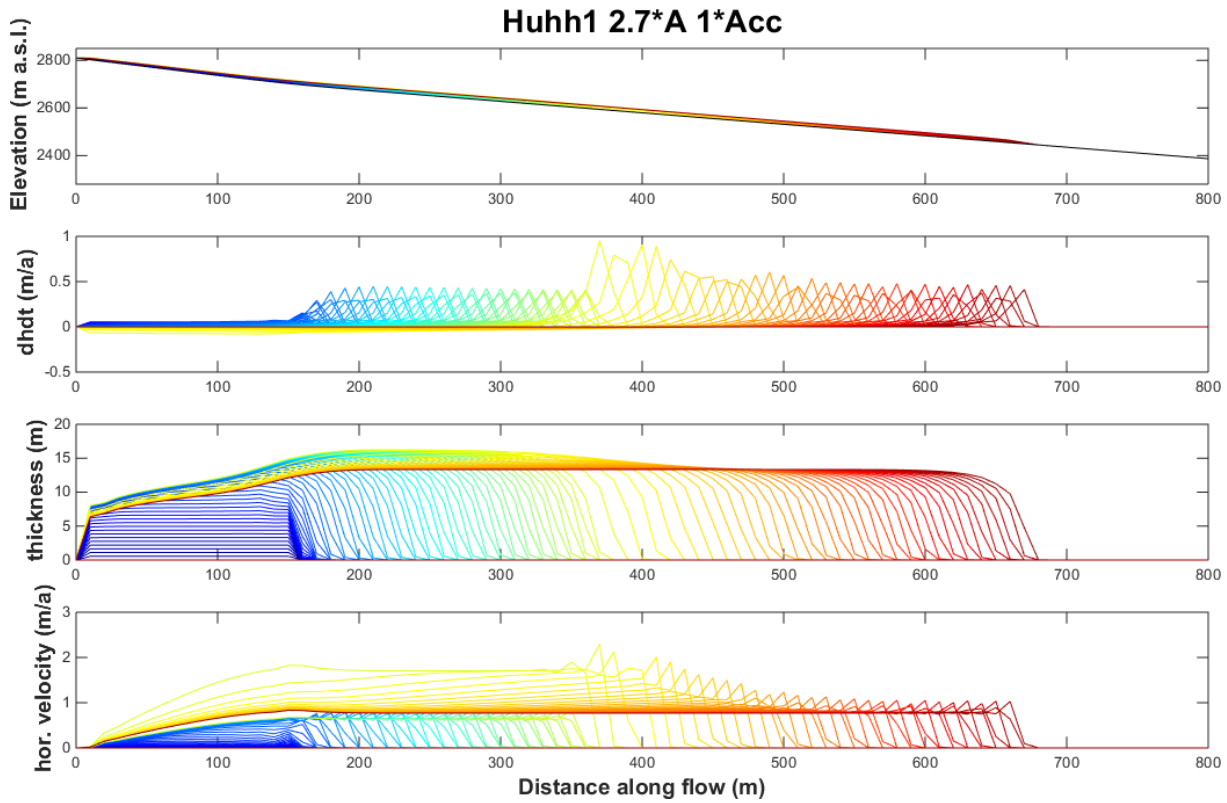

**Figure S23: The evolution of surface geometry, thickness change (dhdt) absolute thickness in m horizontal velocity along the central flow line for rockglacier built-up (600 years runtime) and complex perturbation experiment (temperature increase of 1°C for a -1°C rockglacier and no change in material input after 600 years). The lines are plotted in 10yr steps.**



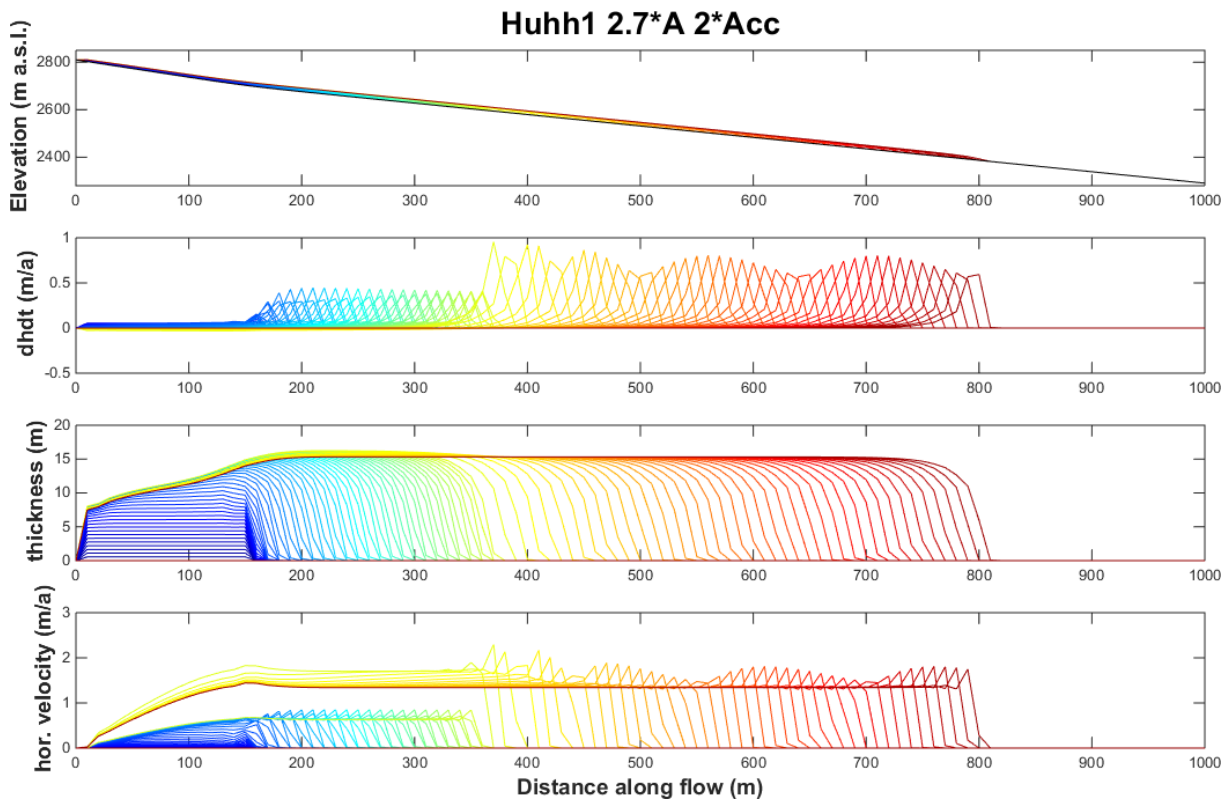

**Figure S24:** The evolution of surface geometry, thickness change (dhdt) absolute thickness in m horizontal velocity along the central flow line for rockglacier built-up (600 years runtime) and complex perturbation experiment (temperature increase of 1°C for a -1°C rockglacier and doubled material input after 600 years). The lines are plotted in 10yr steps.
